# Supplementary material for: Alleviation of Hyperglycemia Induced Vascular Endothelial Injury by Exenatide Might Be Related to the Reduction of Nitrooxidative Stress
Source: Hindawi journal article supplement (doi:10.1155/2013/843657), 2013-01-01
Supplement: f1 [file 843657.f1.pdf]

A

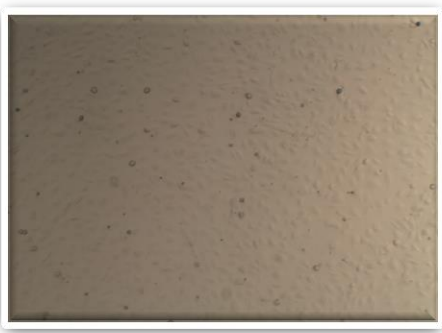

× 40

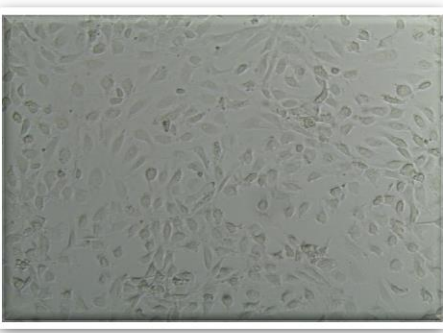

× 100

B

eNOS

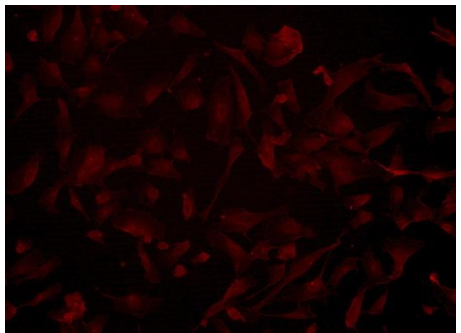

DAPI

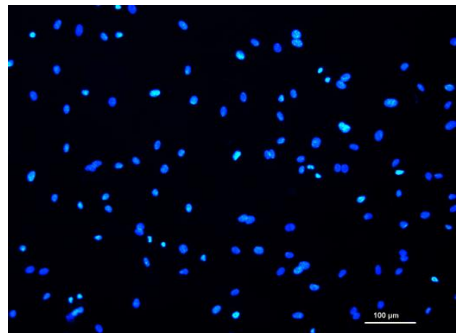

Merge

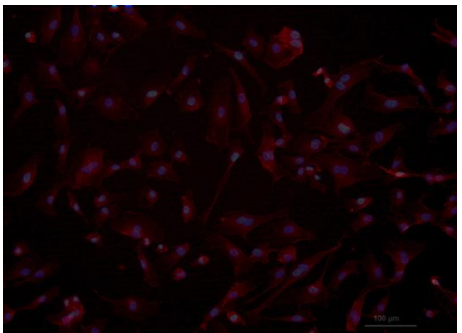

VE-cadherin

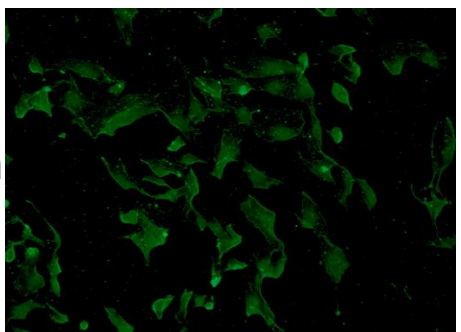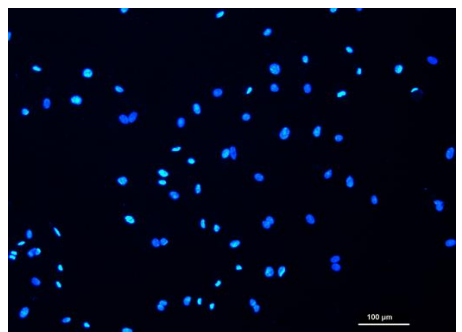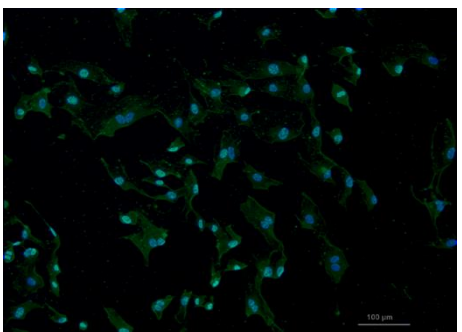

× 100
